# Supplementary material
Source: publisher site journal article supplement (https://www.spandidos-publications.com/3426/downloadSupplementary)
Supplement: Supplementary file 1 [file downloadSupplementary]

## Sheet: Sheet1
Table SIV.
Ingenuity Canonical Pathways	-log(P-value)	Ratio	z-score	Molecules
EIF2 Signaling	12.7	0.0896	1.732	EIF3E,EIF3I,PIK3R5,RPL10A,RPL12,RPL18,RPL18A,RPL19,RPL39,RPL7,RPL7A,RPLP2,RPS10,RPS15,RPS19,RPS28,RPS5,RPS6,UBA52
Regulation of eIF4 and p70S6K Signaling	5.66	0.0654	#NUM!	EIF3E,EIF3I,EIF4EBP2,PIK3R5,RPS10,RPS15,RPS19,RPS28,RPS5,RPS6
mTOR Signaling	3.84	0.0446	#NUM!	EIF3E,EIF3I,PIK3R5,RPS10,RPS15,RPS19,RPS28,RPS5,RPS6
Thiosulfate Disproportionation III (Rhodanese)	3.57	0.667	#NUM!	MPST,TST
NRF2-mediated Oxidative Stress Response	2.68	0.0376	0.447	GSTO1,HACD3,JUN,PIK3R5,PMF1/PMF1-BGLAP,PRDX1,UBB
Oxidative Phosphorylation	2.49	0.0481	1.342	ATP5MC2,COX4I1,NDUFA3,UQCR10,UQCRB
Renal Cell Carcinoma Signaling	2.18	0.0513	#NUM!	JUN,PIK3R5,UBA52,UBB
Huntington's Disease Signaling	2.14	0.0299	0.447	GNG10,GNG5,JUN,PIK3R5,POLR2K,UBA52,UBB
Telomere Extension by Telomerase	2.06	0.133	#NUM!	TERF2IP,XRCC6
Methylthiopropionate Biosynthesis	2.02	1	#NUM!	ADI1
L-cysteine Degradation III	1.72	0.5	#NUM!	MPST
Sirtuin Signaling Pathway	1.72	0.0247	0	ATG4B,JUN,LDHA,NDUFA3,PGAM1,POLR1D,XRCC6
Mitochondrial Dysfunction	1.68	0.0303	#NUM!	ATP5MC2,COX4I1,NDUFA3,UQCR10,UQCRB
fMLP Signaling in Neutrophils	1.61	0.0348	#NUM!	ARPC2,GNG10,GNG5,PIK3R5
Ascorbate Recycling (Cytosolic)	1.55	0.333	#NUM!	GSTO1
D-glucuronate Degradation I	1.55	0.333	#NUM!	CRYL1
Inosine-5'-phosphate Biosynthesis II	1.55	0.333	#NUM!	ATIC
P2Y Purigenic Receptor Signaling Pathway	1.49	0.0317	#NUM!	GNG10,GNG5,JUN,PIK3R5
G Protein Signaling Mediated by Tubby	1.48	0.0667	#NUM!	GNG10,GNG5
Antiproliferative Role of Somatostatin Receptor 2	1.47	0.0405	#NUM!	GNG10,GNG5,PIK3R5
Toll-like Receptor Signaling	1.46	0.04	#NUM!	JUN,UBA52,UBB
Arsenate Detoxification I (Glutaredoxin)	1.42	0.25	#NUM!	GSTO1
Heme Degradation	1.42	0.25	#NUM!	BLVRB
Spermine and Spermidine Degradation I	1.42	0.25	#NUM!	SAT1
IL-8 Signaling	1.4	0.0255	0	CSTB,GNG10,GNG5,JUN,PIK3R5
Androgen Signaling	1.39	0.0296	#NUM!	GNG10,GNG5,JUN,POLR2K
Hereditary Breast Cancer Signaling	1.37	0.0292	#NUM!	PIK3R5,POLR2K,UBA52,UBB
Pyruvate Fermentation to Lactate	1.33	0.2	#NUM!	LDHA
Rapoport-Luebering Glycolytic Shunt	1.33	0.2	#NUM!	PGAM1
RANK Signaling in Osteoclasts	1.31	0.0349	#NUM!	JUN,MAP3K6,PIK3R5
Acute Myeloid Leukemia Signaling	1.28	0.0341	#NUM!	PIK3R5,RUNX1,SPI1
Relaxin Signaling	1.28	0.0272	#NUM!	GNG10,GNG5,JUN,PIK3R5
IL-1 Signaling	1.25	0.033	#NUM!	GNG10,GNG5,JUN
CCR5 Signaling in Macrophages	1.24	0.0326	#NUM!	GNG10,GNG5,JUN
IL-23 Signaling Pathway	1.18	0.0455	#NUM!	PIK3R5,RUNX1
CXCR4 Signaling	1.14	0.0244	#NUM!	GNG10,GNG5,JUN,PIK3R5
SAPK/JNK Signaling	1.14	0.0297	#NUM!	GNG5,JUN,PIK3R5
Cardiac Hypertrophy Signaling	1.13	0.0213	-1	GNG10,GNG5,JUN,MAP3K6,PIK3R5
Wnt/β-catenin Signaling	1.1	0.0235	#NUM!	JUN,UBA52,UBB,WNT10B
Signaling by Rho Family GTPases	1.09	0.0207	#NUM!	ARPC2,GNG10,GNG5,JUN,PIK3R5
Colorectal Cancer Metastasis Signaling	1.06	0.0203	-1	GNG10,GNG5,JUN,PIK3R5,WNT10B
CD27 Signaling in Lymphocytes	1.06	0.0385	#NUM!	JUN,MAP3K6
UVB-Induced MAPK Signaling	1.06	0.0385	#NUM!	JUN,PIK3R5
Role of NFAT in Regulation of the Immune Response	1.06	0.0227	#NUM!	GNG10,GNG5,JUN,PIK3R5
HGF Signaling	1.06	0.0273	#NUM!	JUN,MAP3K6,PIK3R5
HIF1α Signaling	1.05	0.027	#NUM!	JUN,LDHA,PIK3R5
Rac Signaling	1.05	0.027	#NUM!	ARPC2,JUN,PIK3R5
Autophagy	1.04	0.0377	#NUM!	ATG4B,CTSL
EGF Signaling	1.01	0.0364	#NUM!	JUN,PIK3R5
CD28 Signaling in T Helper Cells	1.01	0.0261	#NUM!	ARPC2,JUN,PIK3R5
Endocannabinoid Developing Neuron Pathway	1.01	0.0261	#NUM!	GNG5,MGLL,PIK3R5
Assembly of RNA Polymerase I Complex	1	0.0909	#NUM!	POLR1D
Purine Nucleotides De Novo Biosynthesis II	1	0.0909	#NUM!	ATIC
Production of Nitric Oxide and Reactive Oxygen Species in Macrophages	0.996	0.0216	#NUM!	JUN,MAP3K6,PIK3R5,SPI1
CCR3 Signaling in Eosinophils	0.971	0.025	#NUM!	GNG10,GNG5,PIK3R5
Clathrin-mediated Endocytosis Signaling	0.951	0.0208	#NUM!	ARPC2,PIK3R5,UBA52,UBB
PCP pathway	0.951	0.0333	#NUM!	JUN,WNT10B
IL-2 Signaling	0.939	0.0328	#NUM!	JUN,PIK3R5
Thrombopoietin Signaling	0.917	0.0317	#NUM!	JUN,PIK3R5
CD40 Signaling	0.907	0.0312	#NUM!	JUN,PIK3R5
ErbB2-ErbB3 Signaling	0.907	0.0312	#NUM!	JUN,PIK3R5
Pyridoxal 5'-phosphate Salvage Pathway	0.907	0.0312	#NUM!	MAP3K6,PDXK
Cdc42 Signaling	0.9	0.0233	#NUM!	ARPC2,CDC42SE1,JUN
DNA Double-Strand Break Repair by Non-Homologous End Joining	0.9	0.0714	#NUM!	XRCC6
IL-12 Signaling and Production in Macrophages	0.893	0.0231	#NUM!	JUN,PIK3R5,SPI1
CREB Signaling in Neurons	0.876	0.0195	#NUM!	GNG10,GNG5,PIK3R5,POLR2K
Vitamin-C Transport	0.873	0.0667	#NUM!	GSTO1
Th2 Pathway	0.873	0.0226	#NUM!	JUN,PIK3R5,SPI1
IL-10 Signaling	0.854	0.029	#NUM!	BLVRB,JUN
GM-CSF Signaling	0.842	0.0286	#NUM!	PIK3R5,RUNX1
Ephrin B Signaling	0.824	0.0278	#NUM!	GNG10,GNG5
Ubiquinol-10 Biosynthesis (Eukaryotic)	0.824	0.0588	#NUM!	ECHDC1
Putrescine Degradation III	0.824	0.0588	#NUM!	SAT1
Hypoxia Signaling in the Cardiovascular System	0.824	0.0278	#NUM!	JUN,LDHA
Estrogen-Dependent Breast Cancer Signaling	0.812	0.0274	#NUM!	JUN,PIK3R5
IL-7 Signaling Pathway	0.812	0.0274	#NUM!	JUN,PIK3R5
Angiopoietin Signaling	0.804	0.027	#NUM!	ANGPT4,PIK3R5
Erythropoietin Signaling	0.785	0.0263	#NUM!	JUN,PIK3R5
GDNF Family Ligand-Receptor Interactions	0.785	0.0263	#NUM!	JUN,PIK3R5
Neurotrophin/TRK Signaling	0.785	0.0263	#NUM!	JUN,PIK3R5
Synaptogenesis Signaling Pathway	0.77	0.0163	-0.447	ARPC2,EIF4EBP2,NLGN2,PIK3R5,STXBP6
PKCθ Signaling in T Lymphocytes	0.762	0.02	#NUM!	JUN,MAP3K6,PIK3R5
IL-3 Signaling	0.759	0.0253	#NUM!	JUN,PIK3R5
IL-17 Signaling	0.752	0.025	#NUM!	JUN,PIK3R5
Gαq Signaling	0.752	0.0197	#NUM!	GNG10,GNG5,PIK3R5
JAK/Stat Signaling	0.752	0.025	#NUM!	JUN,PIK3R5
Prolactin Signaling	0.742	0.0247	#NUM!	JUN,PIK3R5
LPS-stimulated MAPK Signaling	0.735	0.0244	#NUM!	JUN,PIK3R5
Polyamine Regulation in Colon Cancer	0.721	0.0455	#NUM!	SAT1
Tec Kinase Signaling	0.708	0.0188	#NUM!	GNG10,GNG5,PIK3R5
PDGF Signaling	0.703	0.0233	#NUM!	JUN,PIK3R5
Ceramide Signaling	0.688	0.0227	#NUM!	JUN,PIK3R5
Glycolysis I	0.688	0.0417	#NUM!	PGAM1
IL-17A Signaling in Gastric Cells	0.672	0.04	#NUM!	JUN
Glutathione-mediated Detoxification	0.672	0.04	#NUM!	GSTO1
Gluconeogenesis I	0.672	0.04	#NUM!	PGAM1
Th1 and Th2 Activation Pathway	0.67	0.018	#NUM!	JUN,PIK3R5,SPI1
GNRH Signaling	0.656	0.0176	#NUM!	GNG5,JUN,MAP3K6
α-Adrenergic Signaling	0.654	0.0215	#NUM!	GNG10,GNG5
ErbB Signaling	0.654	0.0215	#NUM!	JUN,PIK3R5
Neuregulin Signaling	0.646	0.0213	#NUM!	ERBIN,RPS6
GABA Receptor Signaling	0.646	0.0213	#NUM!	UBA52,UBB
ATM Signaling	0.633	0.0208	#NUM!	CBX5,JUN
Role of p14/p19ARF in Tumor Suppression	0.629	0.0357	#NUM!	PIK3R5
UVA-Induced MAPK Signaling	0.627	0.0206	#NUM!	JUN,PIK3R5
RhoGDI Signaling	0.622	0.0169	#NUM!	ARPC2,GNG10,GNG5
p53 Signaling	0.62	0.0204	#NUM!	JUN,PIK3R5
Ephrin Receptor Signaling	0.618	0.0169	#NUM!	ARPC2,GNG10,GNG5
TNFR2 Signaling	0.614	0.0345	#NUM!	JUN
B Cell Receptor Signaling	0.609	0.0167	#NUM!	JUN,MAP3K6,PIK3R5
Protein Ubiquitination Pathway	0.597	0.0149	#NUM!	PSMB6,PSMC1,UBA52,UBB
Mouse Embryonic Stem Cell Pluripotency	0.595	0.0196	#NUM!	ID2,PIK3R5
Telomerase Signaling	0.583	0.0192	#NUM!	PIK3R5,TERF2IP
IGF-1 Signaling	0.583	0.0192	#NUM!	JUN,PIK3R5
T Cell Receptor Signaling	0.583	0.0192	#NUM!	JUN,PIK3R5
4-1BB Signaling in T Lymphocytes	0.578	0.0312	#NUM!	JUN
Inhibition of Angiogenesis by TSP1	0.578	0.0312	#NUM!	JUN
Gαs Signaling	0.572	0.0189	#NUM!	GNG10,GNG5
IL-9 Signaling	0.567	0.0303	#NUM!	PIK3R5
RAR Activation	0.562	0.0157	#NUM!	JUN,RPL7A,SORBS3
Regulation of the Epithelial-Mesenchymal Transition Pathway	0.562	0.0157	#NUM!	ID2,PIK3R5,WNT10B
IL-17A Signaling in Fibroblasts	0.545	0.0286	#NUM!	JUN
Nucleotide Excision Repair Pathway	0.545	0.0286	#NUM!	POLR2K
GPCR-Mediated Nutrient Sensing in Enteroendocrine Cells	0.544	0.018	#NUM!	GNG10,GNG5
Axonal Guidance Signaling	0.542	0.0128	#NUM!	ARPC2,GNG10,GNG5,PIK3R5,SRGAP3,WNT10B
NGF Signaling	0.533	0.0177	#NUM!	MAP3K6,PIK3R5
Breast Cancer Regulation by Stathmin1	0.53	0.0151	#NUM!	GNG10,GNG5,PIK3R5
Apelin Endothelial Signaling Pathway	0.529	0.0175	#NUM!	JUN,PIK3R5
Cell Cycle Regulation by BTG Family Proteins	0.524	0.027	#NUM!	BTG2
Cardiac Hypertrophy Signaling (Enhanced)	0.52	0.0126	-0.816	GNG5,JUN,MAP3K6,PIK3R5,RPS6,WNT10B
GP6 Signaling Pathway	0.519	0.0172	#NUM!	COL6A1,PIK3R5
Docosahexaenoic Acid (DHA) Signaling	0.516	0.0263	#NUM!	PIK3R5
Antigen Presentation Pathway	0.516	0.0263	#NUM!	PSMB6
Thrombin Signaling	0.514	0.0148	#NUM!	GNG10,GNG5,PIK3R5
Renin-Angiotensin Signaling	0.513	0.0171	#NUM!	JUN,PIK3R5
Role of NANOG in Mammalian Embryonic Stem Cell Pluripotency	0.513	0.0171	#NUM!	PIK3R5,WNT10B
April Mediated Signaling	0.506	0.0256	#NUM!	JUN
Triacylglycerol Degradation	0.506	0.0256	#NUM!	MGLL
G Beta Gamma Signaling	0.489	0.0164	#NUM!	GNG10,GNG5
B Cell Activating Factor Signaling	0.488	0.0244	#NUM!	JUN
Role of NFAT in Cardiac Hypertrophy	0.487	0.0142	#NUM!	GNG10,GNG5,PIK3R5
MIF Regulation of Innate Immunity	0.48	0.0238	#NUM!	JUN
FXR/RXR Activation	0.475	0.016	#NUM!	SLC22A7,SLC51B
Gαi Signaling	0.475	0.016	#NUM!	GNG10,GNG5
IL-6 Signaling	0.475	0.016	#NUM!	JUN,PIK3R5
Role of Osteoblasts, Osteoclasts and Chondrocytes in Rheumatoid Arthritis	0.472	0.014	#NUM!	JUN,PIK3R5,WNT10B
14-3-3-mediated Signaling	0.471	0.0159	#NUM!	JUN,PIK3R5
Apelin Pancreas Signaling Pathway	0.471	0.0233	#NUM!	PIK3R5
Endocannabinoid Neuronal Synapse Pathway	0.466	0.0157	#NUM!	GNG5,MGLL
iNOS Signaling	0.463	0.0227	#NUM!	JUN
Reelin Signaling in Neurons	0.462	0.0156	#NUM!	ARPC2,PIK3R5
p70S6K Signaling	0.462	0.0156	#NUM!	PIK3R5,RPS6
Systemic Lupus Erythematosus Signaling	0.46	0.0137	#NUM!	JUN,PIK3R5,SNU13
Gα12/13 Signaling	0.453	0.0154	#NUM!	JUN,PIK3R5
Iron homeostasis signaling pathway	0.449	0.0153	#NUM!	HBA1/HBA2,ISCU
FAT10 Cancer Signaling Pathway	0.447	0.0217	#NUM!	EEF1A1
Human Embryonic Stem Cell Pluripotency	0.445	0.0152	#NUM!	PIK3R5,WNT10B
Ephrin A Signaling	0.44	0.0213	#NUM!	PIK3R5
TNFR1 Signaling	0.433	0.0208	#NUM!	JUN
Aryl Hydrocarbon Receptor Signaling	0.425	0.0146	#NUM!	GSTO1,JUN
Estrogen Receptor Signaling	0.425	0.0146	#NUM!	MED13,POLR2K
Ovarian Cancer Signaling	0.42	0.0145	#NUM!	PIK3R5,WNT10B
Melanoma Signaling	0.419	0.02	#NUM!	PIK3R5
Assembly of RNA Polymerase II Complex	0.419	0.02	#NUM!	POLR2K
Cardiac β-adrenergic Signaling	0.413	0.0143	#NUM!	GNG10,GNG5
UVC-Induced MAPK Signaling	0.412	0.0196	#NUM!	JUN
Phagosome Maturation	0.409	0.0142	#NUM!	CTSL,PRDX1
Lymphotoxin β Receptor Signaling	0.4	0.0189	#NUM!	PIK3R5
Role of IL-17A in Arthritis	0.394	0.0185	#NUM!	PIK3R5
OX40 Signaling Pathway	0.387	0.0182	#NUM!	JUN
CNTF Signaling	0.381	0.0179	#NUM!	PIK3R5
Cell Cycle Control of Chromosomal Replication	0.381	0.0179	#NUM!	ORC4
Glutamate Receptor Signaling	0.381	0.0179	#NUM!	GNG5
Retinoic acid Mediated Apoptosis Signaling	0.376	0.0175	#NUM!	DAP3
MSP-RON Signaling Pathway	0.37	0.0172	#NUM!	PIK3R5
Endometrial Cancer Signaling	0.359	0.0167	#NUM!	PIK3R5
HOTAIR Regulatory Pathway	0.358	0.0128	#NUM!	PIK3R5,WNT10B
HMGB1 Signaling	0.355	0.0127	#NUM!	JUN,PIK3R5
Activation of IRF by Cytosolic Pattern Recognition Receptors	0.354	0.0164	#NUM!	JUN
Role of PI3K/AKT Signaling in the Pathogenesis of Influenza	0.354	0.0164	#NUM!	PIK3R5
SPINK1 General Cancer Pathway	0.354	0.0164	#NUM!	PIK3R5
Glioblastoma Multiforme Signaling	0.339	0.0123	#NUM!	PIK3R5,WNT10B
IL-17A Signaling in Airway Cells	0.338	0.0156	#NUM!	PIK3R5
Myc Mediated Apoptosis Signaling	0.333	0.0154	#NUM!	PIK3R5
Systemic Lupus Erythematosus In B Cell Signaling Pathway	0.333	0.0113	#NUM!	JUN,PIK3R5,TMEM173
ErbB4 Signaling	0.329	0.0152	#NUM!	PIK3R5
Remodeling of Epithelial Adherens Junctions	0.329	0.0152	#NUM!	ARPC2
Germ Cell-Sertoli Cell Junction Signaling	0.327	0.012	#NUM!	MAP3K6,PIK3R5
Role of JAK1 and JAK3 in γc Cytokine Signaling	0.324	0.0149	#NUM!	PIK3R5
Xenobiotic Metabolism Signaling	0.324	0.0112	#NUM!	GSTO1,MAP3K6,PIK3R5
T Cell Exhaustion Signaling Pathway	0.319	0.0118	#NUM!	JUN,PIK3R5
Senescence Pathway	0.318	0.011	#NUM!	JUN,PIK3R5,TMEM173
Basal Cell Carcinoma Signaling	0.311	0.0143	#NUM!	WNT10B
Actin Nucleation by ARP-WASP Complex	0.311	0.0143	#NUM!	ARPC2
IL-15 Signaling	0.306	0.0141	#NUM!	PIK3R5
Growth Hormone Signaling	0.306	0.0141	#NUM!	PIK3R5
Small Cell Lung Cancer Signaling	0.306	0.0141	#NUM!	PIK3R5
Glioma Invasiveness Signaling	0.302	0.0139	#NUM!	PIK3R5
Caveolar-mediated Endocytosis Signaling	0.298	0.0137	#NUM!	COPZ1
Non-Small Cell Lung Cancer Signaling	0.298	0.0137	#NUM!	PIK3R5
Leptin Signaling in Obesity	0.298	0.0137	#NUM!	PIK3R5
Hepatic Cholestasis	0.294	0.0112	#NUM!	JUN,SLC22A7
Role of Wnt/GSK-3β Signaling in the Pathogenesis of Influenza	0.294	0.0135	#NUM!	WNT10B
FcγRIIB Signaling in B Lymphocytes	0.29	0.0133	#NUM!	PIK3R5
Sertoli Cell-Sertoli Cell Junction Signaling	0.287	0.011	#NUM!	JUN,MAP3K6
Agrin Interactions at Neuromuscular Junction	0.286	0.0132	#NUM!	JUN
Macropinocytosis Signaling	0.286	0.0132	#NUM!	PIK3R5
Hepatic Fibrosis / Hepatic Stellate Cell Activation	0.284	0.011	#NUM!	COL6A1,KLF6
Chemokine Signaling	0.282	0.013	#NUM!	JUN
Endothelin-1 Signaling	0.281	0.0109	#NUM!	JUN,PIK3R5
ILK Signaling	0.277	0.0108	#NUM!	JUN,PIK3R5
FLT3 Signaling in Hematopoietic Progenitor Cells	0.275	0.0127	#NUM!	PIK3R5
NF-κB Activation by Viruses	0.264	0.0122	#NUM!	PIK3R5
PEDF Signaling	0.264	0.0122	#NUM!	PIK3R5
IL-4 Signaling	0.264	0.0122	#NUM!	PIK3R5
Role of Macrophages, Fibroblasts and Endothelial Cells in Rheumatoid Arthritis	0.262	0.01	#NUM!	JUN,PIK3R5,WNT10B
BMP signaling pathway	0.26	0.012	#NUM!	JUN
TR/RXR Activation	0.257	0.0119	#NUM!	PIK3R5
HER-2 Signaling in Breast Cancer	0.257	0.0119	#NUM!	PIK3R5
VEGF Family Ligand-Receptor Interactions	0.257	0.0119	#NUM!	PIK3R5
FGF Signaling	0.257	0.0119	#NUM!	PIK3R5
Regulation of Actin-based Motility by Rho	0.244	0.0114	#NUM!	ARPC2
CTLA4 Signaling in Cytotoxic T Lymphocytes	0.244	0.0114	#NUM!	PIK3R5
Regulation of IL-2 Expression in Activated and Anergic T Lymphocytes	0.244	0.0114	#NUM!	JUN
Th17 Activation Pathway	0.244	0.0114	#NUM!	RUNX1
Prostate Cancer Signaling	0.241	0.0112	#NUM!	PIK3R5
Integrin Signaling	0.234	0.00976	#NUM!	ARPC2,PIK3R5
Fcγ Receptor-mediated Phagocytosis in Macrophages and Monocytes	0.228	0.0108	#NUM!	ARPC2
Melanocyte Development and Pigmentation Signaling	0.226	0.0106	#NUM!	PIK3R5
FAK Signaling	0.226	0.0106	#NUM!	PIK3R5
Nitric Oxide Signaling in the Cardiovascular System	0.226	0.0106	#NUM!	PIK3R5
Salvage Pathways of Pyrimidine Ribonucleotides	0.223	0.0105	#NUM!	MAP3K6
Amyotrophic Lateral Sclerosis Signaling	0.22	0.0104	#NUM!	PIK3R5
PAK Signaling	0.22	0.0104	#NUM!	PIK3R5
TGF-β Signaling	0.22	0.0104	#NUM!	JUN
VEGF Signaling	0.218	0.0103	#NUM!	PIK3R5
Apelin Cardiomyocyte Signaling Pathway	0.215	0.0102	#NUM!	PIK3R5
Neuropathic Pain Signaling In Dorsal Horn Neurons	0.21	0.01	#NUM!	PIK3R5
PPAR Signaling	0.207	0.0099	#NUM!	JUN
Sumoylation Pathway	0.207	0.0099	#NUM!	JUN
Chronic Myeloid Leukemia Signaling	0.205	0.0098	#NUM!	PIK3R5
NER Pathway	0.205	0.0098	#NUM!	POLR2K
PD-1, PD-L1 cancer immunotherapy pathway	0.202	0.00971	#NUM!	PIK3R5
Antioxidant Action of Vitamin C	0.199	0.00962	#NUM!	GSTO1
Glucocorticoid Receptor Signaling	0	0.00901	#NUM!	JUN,PIK3R5,POLR2K
Natural Killer Cell Signaling	0	0.00855	#NUM!	PIK3R5
Leukocyte Extravasation Signaling	0	0.00518	#NUM!	PIK3R5
Fc Epsilon RI Signaling	0	0.00855	#NUM!	PIK3R5
Actin Cytoskeleton Signaling	0	0.00939	#NUM!	ARPC2,PIK3R5
PPARα/RXRα Activation	0	0.00562	#NUM!	JUN
LPS/IL-1 Mediated Inhibition of RXR Function	0	0.00952	#NUM!	GSTO1,JUN
Acute Phase Response Signaling	0	0.00562	#NUM!	JUN
Tight Junction Signaling	0	0.00599	#NUM!	JUN
Role of Pattern Recognition Receptors in Recognition of Bacteria and Viruses	0	0.00694	#NUM!	PIK3R5
Virus Entry via Endocytic Pathways	0	0.00935	#NUM!	PIK3R5
Dendritic Cell Maturation	0	0.00578	#NUM!	PIK3R5
iCOS-iCOSL Signaling in T Helper Cells	0	0.00943	#NUM!	PIK3R5
Molecular Mechanisms of Cancer	0	0.00781	#NUM!	JUN,PIK3R5,WNT10B
Corticotropin Releasing Hormone Signaling	0	0.00709	#NUM!	JUN
Cholecystokinin/Gastrin-mediated Signaling	0	0.00855	#NUM!	JUN
Aldosterone Signaling in Epithelial Cells	0	0.00649	#NUM!	PIK3R5
Glioma Signaling	0	0.00917	#NUM!	PIK3R5
Type II Diabetes Mellitus Signaling	0	0.00714	#NUM!	PIK3R5
Pancreatic Adenocarcinoma Signaling	0	0.00926	#NUM!	PIK3R5
Sphingosine-1-phosphate Signaling	0	0.00877	#NUM!	PIK3R5
AMPK Signaling	0	0.00474	#NUM!	PIK3R5
RhoA Signaling	0	0.00826	#NUM!	ARPC2
Phospholipase C Signaling	0	0.00813	#NUM!	GNG10,GNG5
Protein Kinase A Signaling	0	0.00521	#NUM!	GNG10,GNG5
PI3K Signaling in B Lymphocytes	0	0.00746	#NUM!	JUN
Role of Tissue Factor in Cancer	0	0.00862	#NUM!	PIK3R5
Paxillin Signaling	0	0.00943	#NUM!	PIK3R5
Gap Junction Signaling	0	0.00515	#NUM!	PIK3R5
eNOS Signaling	0	0.00658	#NUM!	PIK3R5
Superpathway of Inositol Phosphate Compounds	0	0.00524	#NUM!	PIK3R5
3-phosphoinositide Biosynthesis	0	0.00629	#NUM!	PIK3R5
Epithelial Adherens Junction Signaling	0	0.00667	#NUM!	ARPC2
Adipogenesis pathway	0	0.00758	#NUM!	WNT10B
ERK/MAPK Signaling	0	0.00521	#NUM!	PIK3R5
PTEN Signaling	0	0.00794	#NUM!	PIK3R5
Insulin Receptor Signaling	0	0.00741	#NUM!	PIK3R5
NF-κB Signaling	0	0.00568	#NUM!	PIK3R5
G-Protein Coupled Receptor Signaling	0	0.0037	#NUM!	PIK3R5
Gustation Pathway	0	0.00662	#NUM!	GNG5
Phagosome Formation	0	0.00877	#NUM!	PIK3R5
Th1 Pathway	0	0.00855	#NUM!	PIK3R5
Neuroinflammation Signaling Pathway	0	0.00687	#NUM!	JUN,PIK3R5
Opioid Signaling Pathway	0	0.0041	#NUM!	GNG5
Adrenomedullin signaling pathway	0	0.00521	#NUM!	PIK3R5
Endocannabinoid Cancer Inhibition Pathway	0	0.00704	#NUM!	PIK3R5
Systemic Lupus Erythematosus In T Cell Signaling Pathway	0	0.00926	#NUM!	JUN,PIK3R5
White Adipose Tissue Browning Pathway	0	0.00781	#NUM!	LDHA
Hepatic Fibrosis Signaling Pathway	0	0.00831	#NUM!	JUN,PIK3R5,WNT10B
Calcium Signaling	0	0.00505	#NUM!	ASPH
© 2000-2020 QIAGEN. All rights reserved.
